# Supplementary material for: Mechanistic insights into the challenges of organocatalytic Beckmann rearrangement reactions
Source: Royal Society of Chemistry journal article supplement (doi:10.1039/d2ob01641a), 2022-12-29
Supplement: d2ob01641a1.pdf [file d2ob01641a1.pdf]

## Supporting Information

### Mechanistic Insights into Challenges of Organocatalytic Beckmann Rearrangement Reactions

M. Melin Tataroğlu, F. Aylin Sungur \*

*Istanbul Technical University, Informatics Institute, Computational Science and Engineering Division, Ayazağa  
Campus 34469, Maslak, Istanbul, TURKEY*

E-mail: aylin.sungur@itu.edu.tr

#### The XYZ Coordinates, Energies Of The Structures Along The Reaction Paths

##### Reactant

|   |             |             |             |
|---|-------------|-------------|-------------|
| O | -3.29864500 | -0.64310300 | -0.22786100 |
| N | -1.92624900 | -0.85914500 | -0.26908500 |
| C | -1.26292000 | 0.18630200  | 0.06111000  |
| C | -1.90928100 | 1.49205100  | 0.43247500  |
| H | -1.23173800 | 2.10912100  | 1.02253900  |
| H | -2.19261100 | 2.04661300  | -0.46868300 |
| H | -2.82022500 | 1.30572500  | 1.00313300  |
| C | 0.21832700  | 0.05397300  | 0.03725200  |
| H | -3.67206900 | -1.49675100 | -0.48113300 |
| C | 0.83356500  | -1.18763100 | 0.24939000  |
| H | 0.21627500  | -2.05471200 | 0.46044900  |
| C | 2.21954000  | -1.30439400 | 0.20383500  |
| H | 2.68390300  | -2.27032700 | 0.37673400  |
| C | 3.01154300  | -0.18359900 | -0.05414100 |
| H | 4.09258700  | -0.27575100 | -0.08740600 |
| C | 2.40726300  | 1.05505500  | -0.26289100 |
| H | 3.01475600  | 1.93118000  | -0.46691900 |
| C | 1.01899000  | 1.17483400  | -0.21204900 |
| H | 0.55986000  | 2.14419200  | -0.38211800 |

|                                              |             |
|----------------------------------------------|-------------|
| Sum of electronic and zero-point Energies=   | -439.877621 |
| Sum of electronic and thermal Energies=      | -439.865306 |
| Sum of electronic and thermal Enthalpies=    | -439.864188 |
| Sum of electronic and thermal Free Energies= | -439.920736 |

##### Acetonitrile

|   |             |             |             |
|---|-------------|-------------|-------------|
| C | 0.00000000  | 0.00000000  | -1.18175300 |
| H | 0.00000000  | 1.02792200  | -1.54698600 |
| H | -0.89020700 | -0.51396100 | -1.54698600 |
| H | 0.89020700  | -0.51396100 | -1.54698600 |
| C | 0.00000000  | 0.00000000  | 0.27966700  |
| N | 0.00000000  | 0.00000000  | 1.43621000  |

|                                              |             |
|----------------------------------------------|-------------|
| Sum of electronic and zero-point Energies=   | -132.663473 |
| Sum of electronic and thermal Energies=      | -132.658935 |
| Sum of electronic and thermal Enthalpies=    | -132.657817 |
| Sum of electronic and thermal Free Energies= | -132.691593 |

## DCP

|    |             |             |             |
|----|-------------|-------------|-------------|
| C  | 0.00000900  | 1.37638800  | 0.00024200  |
| C  | 0.66261700  | 0.09197700  | -0.00015700 |
| C  | -0.66263500 | 0.09200400  | 0.00045600  |
| C  | -1.96775900 | -0.52766600 | -0.00180800 |
| C  | -3.10556900 | 0.29110000  | 0.02977800  |
| C  | -2.10722400 | -1.92235200 | -0.03694800 |
| C  | -4.37289800 | -0.28357600 | 0.02883000  |
| H  | -2.98619500 | 1.37074400  | 0.05546600  |
| C  | -3.37651200 | -2.48994100 | -0.03821300 |
| H  | -1.22449200 | -2.55278300 | -0.06536700 |
| H  | -5.25371400 | 0.34935800  | 0.05336700  |
| H  | -3.48547900 | -3.56910400 | -0.06580700 |
| C  | 1.96775900  | -0.52765200 | 0.00188400  |
| C  | 2.10723300  | -1.92232300 | 0.03774100  |
| C  | 3.10552000  | 0.29108700  | -0.03075800 |
| H  | 1.22449500  | -2.55270800 | 0.06704400  |
| C  | 4.37287200  | -0.28360900 | -0.03011200 |
| H  | 2.98618800  | 1.37072100  | -0.05689900 |
| H  | 5.25368400  | 0.34930800  | -0.05533500 |
| Cl | -0.00253200 | 2.43922700  | -1.46391100 |
| Cl | 0.00255400  | 2.43927000  | 1.46431700  |
| C  | 3.37651400  | -2.48992800 | 0.03873100  |
| H  | 3.48547300  | -3.56907600 | 0.06698100  |
| C  | -4.50876800 | -1.67218700 | -0.00457100 |
| H  | -5.49803700 | -2.11881000 | -0.00531200 |
| C  | 4.50875300  | -1.67220200 | 0.00399900  |
| H  | 5.49802500  | -2.11881900 | 0.00440400  |

Sum of electronic and zero-point Energies= -1497.484254  
Sum of electronic and thermal Energies= -1497.464575  
Sum of electronic and thermal Enthalpies= -1497.463457  
Sum of electronic and thermal Free Energies= -1497.540249

## M\_TS1

|   |             |             |             |
|---|-------------|-------------|-------------|
| C | 0.00027900  | 1.27908500  | -0.43166000 |
| C | -0.68546300 | 0.09304200  | -0.26727300 |
| C | 0.68703500  | 0.09374400  | -0.26504600 |
| C | 1.96962100  | -0.54169300 | -0.15585300 |
| C | 3.11780600  | 0.25720300  | -0.27479500 |
| C | 2.07900800  | -1.92071700 | 0.07634700  |
| C | 4.37308300  | -0.32780400 | -0.16466800 |
| H | 3.01396900  | 1.32458300  | -0.44631400 |
| C | 3.33852500  | -2.49680700 | 0.18237700  |
| H | 1.18562000  | -2.52806600 | 0.17318600  |
| H | 5.26551300  | 0.28221600  | -0.25191100 |
| H | 3.43291100  | -3.56227600 | 0.36126800  |
| C | -1.96830100 | -0.54354400 | -0.16460200 |
| C | -2.07972100 | -1.93417200 | -0.01847500 |
| C | -3.11466300 | 0.26609400  | -0.20398600 |
| H | -1.18870300 | -2.55187300 | 0.00688100  |
| C | -4.36994200 | -0.31912900 | -0.09347300 |
| H | -3.00903800 | 1.34166400  | -0.31180500 |

|    |             |             |             |
|----|-------------|-------------|-------------|
| H  | -5.26044000 | 0.29925400  | -0.11711200 |
| Cl | -0.00291200 | 2.30140700  | 1.87710500  |
| Cl | -0.00053600 | 2.71973200  | -1.31150500 |
| C  | -3.33941000 | -2.51037300 | 0.08498500  |
| H  | -3.43543500 | -3.58495400 | 0.19584000  |
| C  | 4.48111900  | -1.70173500 | 0.06164500  |
| H  | 5.46274100  | -2.15658900 | 0.14808700  |
| C  | -4.48011200 | -1.70393400 | 0.04960000  |
| H  | -5.46169000 | -2.15888000 | 0.13594500  |

Sum of electronic and zero-point Energies= -1497.463802  
Sum of electronic and thermal Energies= -1497.444214  
Sum of electronic and thermal Enthalpies= -1497.443097  
Sum of electronic and thermal Free Energies= -1497.520086

### DCP Ion

|    |             |             |             |
|----|-------------|-------------|-------------|
| C  | 0.01388000  | 1.41941500  | -0.67525000 |
| C  | -0.67789900 | 0.25812600  | -0.50229600 |
| C  | 0.71707700  | 0.26678800  | -0.49308800 |
| C  | 1.98665100  | -0.37992200 | -0.35044900 |
| C  | 3.14879900  | 0.40283700  | -0.45220300 |
| C  | 2.06820000  | -1.75853100 | -0.10311500 |
| C  | 4.39090200  | -0.20004900 | -0.30831000 |
| H  | 3.06778500  | 1.46898800  | -0.64039400 |
| C  | 3.31561900  | -2.35138700 | 0.03989800  |
| H  | 1.16402900  | -2.35143700 | -0.02255600 |
| H  | 5.29461800  | 0.39443500  | -0.38326300 |
| H  | 3.39037400  | -3.41575200 | 0.23270400  |
| C  | -1.94330700 | -0.40124800 | -0.38349300 |
| C  | -2.01942100 | -1.78925900 | -0.19458100 |
| C  | -3.10825800 | 0.38140500  | -0.44633000 |
| H  | -1.11412600 | -2.38407400 | -0.14858400 |
| C  | -4.34783900 | -0.23004600 | -0.31851500 |
| H  | -3.03049800 | 1.45507400  | -0.58754200 |
| H  | -5.25326100 | 0.36493900  | -0.36134100 |
| Cl | -0.13410400 | 1.15699800  | 2.56492700  |
| Cl | 0.00452500  | 3.06724000  | -0.88706500 |
| C  | -3.26456000 | -2.39116900 | -0.06974000 |
| H  | -3.33544100 | -3.46316000 | 0.07692200  |
| C  | 4.47151100  | -1.57320800 | -0.06350600 |
| H  | 5.44414500  | -2.04120000 | 0.04986500  |
| C  | -4.42319200 | -1.61248400 | -0.13072000 |
| H  | -5.39377200 | -2.08746000 | -0.02927600 |

Sum of electronic and zero-point Energies= -1497.469191  
Sum of electronic and thermal Energies= -1497.448555  
Sum of electronic and thermal Enthalpies= -1497.447437  
Sum of electronic and thermal Free Energies= -1497.528520

### M\_TS2

|   |             |             |            |
|---|-------------|-------------|------------|
| O | 0.85269200  | -1.06575900 | 1.74063900 |
| N | 0.19955200  | 0.16866200  | 1.64022000 |
| C | -1.08184300 | 0.04831800  | 1.66784700 |
| C | -1.83663300 | -1.21830500 | 1.94991200 |
| H | -2.21613100 | -1.17924900 | 2.97693100 |
| H | -2.69382200 | -1.30489100 | 1.27766100 |

|    |             |             |             |
|----|-------------|-------------|-------------|
| H  | -1.20110100 | -2.09719400 | 1.85653800  |
| C  | -1.83760200 | 1.29935900  | 1.40171500  |
| C  | 1.19444700  | -1.63726200 | -0.04462300 |
| C  | 0.12666400  | -1.28672600 | -0.87307400 |
| C  | 1.25251000  | -0.53189000 | -0.89736300 |
| C  | 2.03450300  | 0.58178600  | -1.36485400 |
| C  | -1.22465500 | -1.56630700 | -1.29740600 |
| Cl | 2.11807300  | -3.02462300 | 0.33434400  |
| H  | 1.79669900  | -0.82550000 | 2.09956000  |
| C  | -1.27246800 | 2.30614200  | 0.60593900  |
| H  | -0.27927600 | 2.16049000  | 0.19084600  |
| C  | -1.98599000 | 3.46942900  | 0.33536600  |
| H  | -1.54381100 | 4.23928900  | -0.28902600 |
| C  | -3.27043700 | 3.64002300  | 0.85538300  |
| H  | -3.82770400 | 4.54639100  | 0.64075900  |
| C  | -3.84001600 | 2.63973300  | 1.64234300  |
| H  | -4.83835400 | 2.76697100  | 2.04812700  |
| C  | -3.13124900 | 1.47006100  | 1.90891500  |
| H  | -3.58666400 | 0.69770900  | 2.52089200  |
| C  | 1.55017000  | 1.42608800  | -2.37572200 |
| H  | 0.58271400  | 1.23299500  | -2.82869800 |
| C  | 2.32275600  | 2.50279600  | -2.79293700 |
| H  | 1.95750600  | 3.16045800  | -3.57426600 |
| C  | 4.04725800  | 1.89909700  | -1.19526400 |
| H  | 5.01234000  | 2.09058600  | -0.73848400 |
| C  | 3.28464800  | 0.81547800  | -0.77353300 |
| H  | 3.63249700  | 0.16397800  | 0.02409700  |
| C  | -1.76928700 | -2.83880500 | -1.07247600 |
| H  | -1.15990800 | -3.61377600 | -0.61635300 |
| C  | -3.08769600 | -3.09269600 | -1.43222400 |
| H  | -3.51417000 | -4.07612900 | -1.26653700 |
| C  | -3.32506300 | -0.80691000 | -2.20912600 |
| H  | -3.93579500 | -0.02004400 | -2.63862100 |
| C  | -2.00169100 | -0.54894500 | -1.86905900 |
| H  | -1.57688000 | 0.43971500  | -2.01539600 |
| Cl | 3.45834800  | -0.37171900 | 2.71714300  |
| C  | 3.56741100  | 2.73884100  | -2.20187300 |
| H  | 4.16467900  | 3.58460900  | -2.52749400 |
| C  | -3.86459100 | -2.07715900 | -1.99450900 |
| H  | -4.89725300 | -2.27602500 | -2.26273300 |

Sum of electronic and zero-point Energies= -1937.354091  
Sum of electronic and thermal Energies= -1937.321035  
Sum of electronic and thermal Enthalpies= -1937.319917  
Sum of electronic and thermal Free Energies= -1937.428109

#### M1+HCl

|   |             |             |             |
|---|-------------|-------------|-------------|
| O | -0.03585400 | -1.32926400 | 0.11528500  |
| N | -1.33840500 | -0.82330500 | 0.18094500  |
| C | -2.19856600 | -1.64279700 | -0.29975400 |
| C | -1.85891400 | -2.98787100 | -0.87758000 |
| H | -2.68091400 | -3.68812300 | -0.72352100 |
| H | -1.68285000 | -2.89843800 | -1.95519100 |
| H | -0.95230100 | -3.38280300 | -0.42107200 |
| C | -3.60952100 | -1.16973200 | -0.29066700 |
| C | -4.52708900 | -1.68875100 | -1.21153700 |
| C | -4.03764900 | -0.19739400 | 0.62443200  |
| C | -5.84504600 | -1.23361200 | -1.22839600 |

|    |             |             |             |
|----|-------------|-------------|-------------|
| H  | -4.21334000 | -2.44046600 | -1.92944600 |
| C  | -5.35431000 | 0.25156900  | 0.60889800  |
| H  | -3.33328300 | 0.19346600  | 1.35171600  |
| C  | -6.26228200 | -0.26361300 | -0.31934400 |
| H  | -6.54424500 | -1.63912900 | -1.95270200 |
| H  | -5.67677800 | 0.99906700  | 1.32703700  |
| H  | -7.28985100 | 0.08594100  | -0.32833000 |
| C  | 0.84390700  | -0.44055000 | 0.71870100  |
| C  | 2.12905800  | -0.13749600 | 0.12435800  |
| C  | 1.23710300  | 0.84170000  | 0.16404900  |
| C  | 0.80175200  | 2.20639800  | -0.04145200 |
| C  | -0.51723200 | 2.55924900  | 0.27977100  |
| C  | 1.68269200  | 3.17596900  | -0.54234100 |
| C  | -0.94715800 | 3.87081500  | 0.09941400  |
| H  | -1.18916500 | 1.79338200  | 0.65721300  |
| C  | 1.24630500  | 4.48416600  | -0.72066300 |
| H  | 2.70450500  | 2.90297600  | -0.78567500 |
| H  | -1.96816700 | 4.14270300  | 0.34742200  |
| H  | 1.92973600  | 5.23272800  | -1.10799000 |
| C  | 3.41886900  | -0.71890700 | -0.17794500 |
| C  | 4.43460100  | 0.03088800  | -0.78821000 |
| C  | 3.64194400  | -2.06517900 | 0.14375400  |
| C  | 5.65893000  | -0.56457600 | -1.07305500 |
| H  | 4.26028300  | 1.07207500  | -1.03948200 |
| C  | 4.86989600  | -2.65474900 | -0.14087100 |
| H  | 2.84734100  | -2.63748300 | 0.61460900  |
| H  | 6.44383500  | 0.01530800  | -1.54763000 |
| H  | 5.04119500  | -3.69665200 | 0.10912500  |
| Cl | 0.69575100  | -0.62609500 | 2.54693700  |
| C  | 5.87787200  | -1.90569500 | -0.74988000 |
| H  | 6.83497800  | -2.36649700 | -0.97288200 |
| C  | -0.06800800 | 4.83311600  | -0.40007000 |
| H  | -0.40598400 | 5.85512900  | -0.53967900 |

Sum of electronic and zero-point Energies= -1476.610692  
Sum of electronic and thermal Energies= -1476.580807  
Sum of electronic and thermal Enthalpies= -1476.579690  
Sum of electronic and thermal Free Energies= -1476.681014

### M\_TS3

|   |             |             |             |
|---|-------------|-------------|-------------|
| O | -0.15022600 | -1.34259400 | -0.23151000 |
| N | -1.42962300 | -0.72444300 | -0.19770500 |
| C | -2.35449900 | -1.61052900 | -0.25886200 |
| C | -2.10933100 | -3.08854700 | -0.36044100 |
| H | -2.99443700 | -3.64602300 | -0.05720900 |
| H | -1.86023100 | -3.35549800 | -1.39277200 |
| H | -1.26539200 | -3.37206900 | 0.26950300  |
| C | -3.73829500 | -1.06891200 | -0.24222400 |
| C | -4.76059400 | -1.74308400 | -0.91964100 |
| C | -4.02917800 | 0.12020200  | 0.43952400  |
| C | -6.05335700 | -1.22288000 | -0.93218300 |
| H | -4.54749500 | -2.66514500 | -1.45211300 |
| C | -5.32300800 | 0.63183100  | 0.43214100  |
| H | -3.24021500 | 0.62661100  | 0.98654800  |
| C | -6.33687900 | -0.03639700 | -0.25702000 |
| H | -6.83867800 | -1.74630700 | -1.46775100 |
| H | -5.54306100 | 1.54761900  | 0.97130800  |
| H | -7.34612300 | 0.36298500  | -0.26082000 |

|    |             |             |             |
|----|-------------|-------------|-------------|
| C  | 0.78515600  | -0.49031100 | 0.12700600  |
| C  | 2.13246900  | -0.24905000 | -0.12882000 |
| C  | 1.26831800  | 0.80003200  | -0.09226300 |
| C  | 0.95317200  | 2.20560800  | -0.14595000 |
| C  | -0.38945300 | 2.59358100  | -0.02582100 |
| C  | 1.96081900  | 3.16888700  | -0.29942400 |
| C  | -0.71983800 | 3.94369400  | -0.06332400 |
| H  | -1.14958400 | 1.82680700  | 0.09075100  |
| C  | 1.62094500  | 4.51617700  | -0.33694500 |
| H  | 2.99802100  | 2.86200400  | -0.38270300 |
| H  | -1.75643200 | 4.25026700  | 0.02881800  |
| H  | 2.39561300  | 5.26610600  | -0.45522000 |
| C  | 3.44022900  | -0.83935900 | -0.26605300 |
| C  | 4.56453400  | -0.06149900 | -0.57713500 |
| C  | 3.56583700  | -2.22301700 | -0.07370200 |
| C  | 5.80785900  | -0.67155700 | -0.69675300 |
| H  | 4.46095600  | 1.00769100  | -0.72884600 |
| C  | 4.81414000  | -2.82438400 | -0.18869100 |
| H  | 2.68531900  | -2.81052300 | 0.16976500  |
| H  | 6.68051800  | -0.07564900 | -0.94142900 |
| H  | 4.91661200  | -3.89355600 | -0.03695100 |
| Cl | 0.51731300  | -0.70768600 | 2.48598500  |
| C  | 5.93251200  | -2.04912600 | -0.50116700 |
| H  | 6.90619100  | -2.51950300 | -0.59421300 |
| C  | 0.28344800  | 4.90216300  | -0.21959500 |
| H  | 0.02322200  | 5.95554400  | -0.24833600 |

Sum of electronic and zero-point Energies= -1476.600724  
Sum of electronic and thermal Energies= -1476.570054  
Sum of electronic and thermal Enthalpies= -1476.568936  
Sum of electronic and thermal Free Energies= -1476.672403

## M2

|   |             |             |             |
|---|-------------|-------------|-------------|
| O | -0.16520800 | -1.42239600 | -0.47695600 |
| N | -1.44737300 | -0.76893500 | -0.45064000 |
| C | -2.36660200 | -1.64266800 | -0.26599100 |
| C | -2.11919100 | -3.11670000 | -0.12976000 |
| H | -1.34891400 | -3.28620900 | 0.62630200  |
| H | -3.02981600 | -3.63604700 | 0.16262300  |
| H | -1.75265400 | -3.52781500 | -1.07480000 |
| C | -3.73856900 | -1.07965200 | -0.19444300 |
| C | -4.81362000 | -1.79189900 | -0.73721500 |
| C | -3.96146900 | 0.16739000  | 0.40310200  |
| C | -6.09596400 | -1.24913700 | -0.70435400 |
| H | -4.64940700 | -2.75959000 | -1.20189500 |
| C | -5.24654900 | 0.70027300  | 0.44386900  |
| H | -3.12873800 | 0.69970400  | 0.85255200  |
| C | -6.31431500 | -0.00434100 | -0.11390800 |
| H | -6.92437400 | -1.79963600 | -1.13816900 |
| H | -5.41545200 | 1.66180000  | 0.91776900  |
| H | -7.31601900 | 0.41226100  | -0.08071600 |
| C | 0.78667800  | -0.55687300 | -0.41639500 |
| C | 2.13680600  | -0.32685400 | -0.39364200 |
| C | 1.24972700  | 0.73341900  | -0.38578900 |
| C | 0.94687600  | 2.13857600  | -0.32847900 |
| C | -0.40089300 | 2.52963600  | -0.34481900 |
| C | 1.96940500  | 3.09424600  | -0.24605300 |
| C | -0.72031900 | 3.88014800  | -0.27992200 |

|    |             |             |             |
|----|-------------|-------------|-------------|
| H  | -1.17109000 | 1.76681100  | -0.40882900 |
| C  | 1.63917200  | 4.44241300  | -0.18080600 |
| H  | 3.00767600  | 2.78165300  | -0.23010900 |
| H  | -1.75908000 | 4.19223200  | -0.29166300 |
| H  | 2.42321700  | 5.18875400  | -0.11403400 |
| C  | 3.46249400  | -0.88282600 | -0.34072700 |
| C  | 4.59638500  | -0.05793000 | -0.35330300 |
| C  | 3.59370300  | -2.27815700 | -0.26825300 |
| C  | 5.85921800  | -0.63422900 | -0.29371300 |
| H  | 4.48696700  | 1.01940300  | -0.41261200 |
| C  | 4.86045400  | -2.84493200 | -0.20568800 |
| H  | 2.70457700  | -2.90121900 | -0.25705800 |
| H  | 6.74184100  | -0.00436900 | -0.30354200 |
| H  | 4.97005300  | -3.92221100 | -0.14596600 |
| Cl | 0.40734700  | -0.39535500 | 2.64171300  |
| C  | 0.29789700  | 4.83270700  | -0.19824900 |
| H  | 0.04551100  | 5.88712000  | -0.14729400 |
| C  | 5.98959400  | -2.02302500 | -0.21909600 |
| H  | 6.97856700  | -2.46739300 | -0.16975900 |

Sum of electronic and zero-point Energies= -1476.607552  
Sum of electronic and thermal Energies= -1476.575889  
Sum of electronic and thermal Enthalpies= -1476.574771  
Sum of electronic and thermal Free Energies= -1476.681653

#### M\_TS4

|   |             |             |             |
|---|-------------|-------------|-------------|
| O | 0.37548400  | -1.99059000 | -1.14379800 |
| N | -1.58262500 | -1.33668200 | -0.97969600 |
| C | -2.05313500 | -2.04250800 | -0.09737100 |
| C | -1.79643000 | -3.22795900 | 0.74431400  |
| H | -1.92717500 | -2.93641500 | 1.78749200  |
| H | -2.52350400 | -4.00040700 | 0.48013900  |
| H | -0.77599900 | -3.56404900 | 0.56384100  |
| C | -3.30045200 | -1.13053200 | -0.17519600 |
| C | -4.38378900 | -1.51468800 | -0.97913000 |
| C | -3.35680100 | -0.02337600 | 0.68384900  |
| C | -5.57076900 | -0.80444900 | -0.86856600 |
| H | -4.28689500 | -2.35204800 | -1.66274800 |
| C | -4.55443500 | 0.67519100  | 0.77833300  |
| H | -2.47311900 | 0.24499300  | 1.25948100  |
| C | -5.65199100 | 0.28475600  | 0.00656900  |
| H | -6.42787800 | -1.08545500 | -1.47005500 |
| H | -4.62898200 | 1.53092100  | 1.44036200  |
| H | -6.58029400 | 0.84280100  | 0.07622500  |
| C | 1.01877200  | -0.96793400 | -0.86379000 |
| C | 2.23166200  | -0.33754900 | -0.56149800 |
| C | 1.08679000  | 0.40827100  | -0.60235800 |
| C | 0.44517400  | 1.69661200  | -0.43059900 |
| C | -0.85333100 | 1.89313700  | -0.91848400 |
| C | 1.10590100  | 2.73268600  | 0.24373200  |
| C | -1.48318600 | 3.12086200  | -0.73768100 |
| H | -1.35698600 | 1.08194400  | -1.43336800 |
| C | 0.46773400  | 3.95427800  | 0.43020900  |
| H | 2.10321300  | 2.57102100  | 0.64054400  |
| H | -2.48809100 | 3.27268400  | -1.11837900 |
| H | 0.97522100  | 4.75349000  | 0.96002400  |
| C | 3.65890000  | -0.43502000 | -0.34063800 |
| C | 4.44877300  | 0.71444100  | -0.20070800 |

|    |             |             |             |
|----|-------------|-------------|-------------|
| C  | 4.24723100  | -1.70614500 | -0.27754300 |
| C  | 5.81797700  | 0.58964700  | 0.00736300  |
| H  | 3.99205700  | 1.69649400  | -0.27036300 |
| C  | 5.61613600  | -1.82435800 | -0.06134000 |
| H  | 3.62510500  | -2.58883200 | -0.39244200 |
| H  | 6.43193000  | 1.47807400  | 0.11138000  |
| H  | 6.07253600  | -2.80694600 | -0.00464400 |
| Cl | -0.24134300 | -0.60900900 | 2.34838700  |
| C  | -0.82453700 | 4.14971300  | -0.06246200 |
| H  | -1.31829700 | 5.10532800  | 0.08286800  |
| C  | 6.39984100  | -0.67792200 | 0.08098300  |
| H  | 7.46829900  | -0.77189000 | 0.24738800  |

Sum of electronic and zero-point Energies= -1476.571168  
Sum of electronic and thermal Energies= -1476.538973  
Sum of electronic and thermal Enthalpies= -1476.537855  
Sum of electronic and thermal Free Energies= -1476.644252

### M3

|   |             |             |             |
|---|-------------|-------------|-------------|
| O | 0.28298900  | -2.02190400 | -0.30043300 |
| N | -1.65656700 | -0.93868800 | -0.79142000 |
| C | -1.13496900 | -1.96166400 | -0.28806400 |
| C | -1.68233700 | -3.21913200 | 0.28731100  |
| H | -1.49081100 | -3.21825100 | 1.36435200  |
| H | -2.75277200 | -3.28887600 | 0.09833100  |
| H | -1.16543300 | -4.07122100 | -0.16064500 |
| C | -3.05362800 | -0.73308300 | -0.71236800 |
| C | -3.76444200 | -0.43406600 | -1.87767500 |
| C | -3.70034900 | -0.73160100 | 0.52866600  |
| C | -5.13145200 | -0.17609500 | -1.80284400 |
| H | -3.24158800 | -0.41342700 | -2.82882500 |
| C | -5.06517100 | -0.45675100 | 0.59383000  |
| H | -3.11865000 | -0.92861600 | 1.42751800  |
| C | -5.78550300 | -0.18516900 | -0.56965100 |
| H | -5.68492000 | 0.04316900  | -2.71051200 |
| H | -5.56465500 | -0.45312500 | 1.55773200  |
| H | -6.84837700 | 0.02689500  | -0.51577000 |
| C | 0.92688000  | -0.90122100 | -0.23087100 |
| C | 2.15804700  | -0.30395900 | -0.24440400 |
| C | 1.01064700  | 0.46143500  | -0.09953500 |
| C | 0.40378400  | 1.76104800  | 0.03034800  |
| C | -0.91461500 | 1.87601800  | 0.49616900  |
| C | 1.13870700  | 2.90189700  | -0.32661900 |
| C | -1.49293400 | 3.13591100  | 0.59503000  |
| H | -1.44708100 | 0.98326100  | 0.80350700  |
| C | 0.54704000  | 4.15548700  | -0.23370600 |
| H | 2.15295200  | 2.80148500  | -0.69918400 |
| H | -2.50894000 | 3.23438200  | 0.96251400  |
| H | 1.10630700  | 5.04005800  | -0.51794200 |
| C | 3.58967200  | -0.42814700 | -0.31684700 |
| C | 4.41144800  | 0.69316100  | -0.13190500 |
| C | 4.14800300  | -1.69356600 | -0.55548300 |
| C | 5.79139100  | 0.54564700  | -0.19089800 |
| H | 3.97029800  | 1.66377600  | 0.06842300  |
| C | 5.52906000  | -1.83011200 | -0.61758500 |
| H | 3.49733600  | -2.55239300 | -0.68938800 |
| H | 6.43448500  | 1.40664100  | -0.04512300 |
| H | 5.96974800  | -2.80360800 | -0.80246400 |



|    |             |             |             |
|----|-------------|-------------|-------------|
| Cl | -0.42552900 | -0.90348000 | 2.70970200  |
| C  | -0.76650100 | 4.27076600  | 0.22741000  |
| H  | -1.22454400 | 5.25181200  | 0.30494100  |
| C  | 6.34677400  | -0.71243600 | -0.43622900 |
| H  | 7.42540100  | -0.82296600 | -0.48348500 |

Sum of electronic and zero-point Energies= -1476.657011  
Sum of electronic and thermal Energies= -1476.625687  
Sum of electronic and thermal Enthalpies= -1476.624570  
Sum of electronic and thermal Free Energies= -1476.728802

### M\_TS5

|    |             |             |             |
|----|-------------|-------------|-------------|
| O  | -0.11624900 | -0.61837600 | -1.29575900 |
| N  | 0.82524800  | 1.39863900  | -0.81344200 |
| C  | 0.91400700  | 0.30881500  | -1.43337500 |
| C  | 1.96314000  | -0.23889000 | -2.34361900 |
| H  | 1.48596300  | -0.68139500 | -3.22059100 |
| H  | 2.65314700  | 0.54761500  | -2.64651000 |
| H  | 2.52263300  | -1.02697900 | -1.82744600 |
| C  | 1.89446700  | 2.31880100  | -0.80268600 |
| C  | 3.14218800  | 1.95444400  | -0.28376400 |
| C  | 1.67190500  | 3.63092500  | -1.23094800 |
| C  | 4.16795400  | 2.89469500  | -0.22069800 |
| H  | 3.28798700  | 0.93975100  | 0.07897000  |
| C  | 2.70714000  | 4.56192300  | -1.17337300 |
| H  | 0.69351600  | 3.90703900  | -1.61368400 |
| C  | 3.95678300  | 4.19911800  | -0.66900200 |
| H  | 5.13373400  | 2.60549900  | 0.18258300  |
| H  | 2.53364400  | 5.57636100  | -1.51887500 |
| H  | 4.75753000  | 4.92969200  | -0.61754600 |
| C  | -1.08170400 | -0.38248100 | -0.39576400 |
| C  | -2.41342300 | -0.81271100 | -0.29693600 |
| C  | -2.15271300 | 0.50493900  | -0.15600700 |
| C  | -2.68151100 | 1.84645100  | -0.01306700 |
| C  | -1.83596100 | 2.94444500  | 0.18964100  |
| C  | -4.06961800 | 2.02929000  | -0.09729300 |
| C  | -2.38377400 | 4.21801200  | 0.30678400  |
| H  | -0.76825300 | 2.77794000  | 0.26682100  |
| C  | -4.60847400 | 3.30601000  | 0.01519600  |
| H  | -4.71869100 | 1.17542400  | -0.26599000 |
| H  | -1.73188700 | 5.07019100  | 0.47041900  |
| H  | -5.68163600 | 3.44837100  | -0.05502500 |
| C  | -3.34079000 | -1.92184100 | -0.36853600 |
| C  | -4.60928200 | -1.81837900 | 0.21900800  |
| C  | -2.96134400 | -3.10058500 | -1.02530900 |
| C  | -5.49085500 | -2.89145600 | 0.14848600  |
| H  | -4.88945600 | -0.91123300 | 0.74523000  |
| C  | -3.85279500 | -4.16527800 | -1.10198900 |
| H  | -1.97918600 | -3.16991300 | -1.48315600 |
| H  | -6.46988000 | -2.81589800 | 0.60957700  |
| H  | -3.56425400 | -5.07501900 | -1.61761200 |
| Cl | -0.54777300 | 1.31971000  | 3.04195100  |
| O  | -0.20241300 | -0.78582200 | 1.14727000  |
| N  | 1.18630900  | -0.98329000 | 1.11334300  |
| C  | 1.51350500  | -2.14412000 | 0.66838400  |
| C  | 0.55009800  | -3.20702200 | 0.23114700  |
| H  | 0.50253200  | -3.23788000 | -0.86310000 |
| H  | 0.88921600  | -4.18381400 | 0.58166600  |

|   |             |             |             |
|---|-------------|-------------|-------------|
| H | -0.44830700 | -3.01111000 | 0.62142600  |
| C | 2.97803300  | -2.39516700 | 0.58017000  |
| H | -0.32950500 | 0.02475500  | 1.79070500  |
| C | 3.88807600  | -1.61021200 | 1.30427000  |
| H | 3.51492300  | -0.83561500 | 1.96611600  |
| C | 5.25558300  | -1.83154600 | 1.18448400  |
| H | 5.94976000  | -1.22219900 | 1.75448000  |
| C | 5.73430900  | -2.83735700 | 0.34139400  |
| H | 6.80224800  | -3.00808200 | 0.24939200  |
| C | 4.83626300  | -3.62426800 | -0.37601100 |
| H | 5.19987800  | -4.40769900 | -1.03292900 |
| C | 3.46395000  | -3.40825200 | -0.25475000 |
| H | 2.77784900  | -4.02526500 | -0.82643900 |
| C | -5.11486900 | -4.06167700 | -0.51396000 |
| H | -5.80688600 | -4.89572900 | -0.57082200 |
| C | -3.76518300 | 4.40007200  | 0.21915100  |
| H | -4.18669100 | 5.39608900  | 0.31161700  |

Sum of electronic and zero-point Energies= -1916.535707  
Sum of electronic and thermal Energies= -1916.491835  
Sum of electronic and thermal Enthalpies= -1916.490717  
Sum of electronic and thermal Free Energies= -1916.623450

#### Meisenheimer Complex-HCl Intermediate

|   |             |             |             |
|---|-------------|-------------|-------------|
| O | -0.10275300 | -0.54335900 | -1.24000600 |
| N | 0.80921600  | 1.47344700  | -0.72578500 |
| C | 0.87675200  | 0.41140500  | -1.40307100 |
| C | 1.88898600  | -0.05098700 | -2.40146100 |
| H | 1.37854700  | -0.50139300 | -3.25509500 |
| H | 2.51448500  | 0.77843900  | -2.72941500 |
| H | 2.52433400  | -0.81771800 | -1.94319000 |
| C | 1.85177900  | 2.42019100  | -0.74603100 |
| C | 3.13853600  | 2.07746600  | -0.31257300 |
| C | 1.57120400  | 3.74095200  | -1.11196500 |
| C | 4.13971700  | 3.04540300  | -0.27217200 |
| H | 3.33506800  | 1.05505700  | 0.00204000  |
| C | 2.58083900  | 4.70068300  | -1.07699800 |
| H | 0.56480000  | 4.00072800  | -1.42773200 |
| C | 3.86718600  | 4.35863500  | -0.65732500 |
| H | 5.13501700  | 2.77150800  | 0.06449100  |
| H | 2.35873800  | 5.72158100  | -1.37242800 |
| H | 4.64873300  | 5.11081600  | -0.62283200 |
| C | -0.96645300 | -0.39584600 | -0.17127600 |
| C | -2.33521600 | -0.83895800 | -0.18353100 |
| C | -2.11909400 | 0.46452500  | -0.03469900 |
| C | -2.68710600 | 1.79997000  | 0.04504900  |
| C | -1.89221200 | 2.92314200  | 0.30494600  |
| C | -4.06526700 | 1.95066600  | -0.16962300 |
| C | -2.47810700 | 4.18555300  | 0.35059800  |
| H | -0.83014600 | 2.78652400  | 0.47257100  |
| C | -4.64256900 | 3.21515400  | -0.12819800 |
| H | -4.67514400 | 1.07730000  | -0.38270600 |
| H | -1.86320600 | 5.05593500  | 0.55738300  |
| H | -5.70789700 | 3.32945900  | -0.29984800 |
| C | -3.25450700 | -1.95836200 | -0.30410900 |
| C | -4.50553600 | -1.89607100 | 0.32469800  |
| C | -2.90343400 | -3.09137700 | -1.04982600 |

|    |             |             |             |
|----|-------------|-------------|-------------|
| C  | -5.39380000 | -2.96087800 | 0.21091600  |
| H  | -4.76745400 | -1.02286800 | 0.91477300  |
| C  | -3.80086800 | -4.14857300 | -1.16959800 |
| H  | -1.93951300 | -3.13086000 | -1.54796200 |
| H  | -6.35827100 | -2.91316900 | 0.70585100  |
| H  | -3.53040300 | -5.02101700 | -1.75518300 |
| Cl | -0.28120700 | 1.30598600  | 3.00492700  |
| O  | -0.18215600 | -0.69330500 | 1.10970100  |
| N  | 1.22437800  | -0.95748000 | 1.02088900  |
| C  | 1.47430800  | -2.15687300 | 0.63527700  |
| C  | 0.45490000  | -3.19224800 | 0.27502600  |
| H  | 0.34313700  | -3.22360300 | -0.81439100 |
| H  | 0.78589900  | -4.17585700 | 0.61153300  |
| H  | -0.51276600 | -2.96389800 | 0.72152400  |
| C  | 2.92417700  | -2.47315200 | 0.52119700  |
| H  | -0.24454800 | 0.18113900  | 1.85163400  |
| C  | 3.87921900  | -1.72278400 | 1.22293900  |
| H  | 3.55271000  | -0.92717600 | 1.88459300  |
| C  | 5.23260300  | -2.00713600 | 1.07994000  |
| H  | 5.96506200  | -1.42790600 | 1.63289700  |
| C  | 5.64831600  | -3.03745700 | 0.23337200  |
| H  | 6.70557600  | -3.25673500 | 0.12296900  |
| C  | 4.70354600  | -3.78715000 | -0.46430000 |
| H  | 5.02038200  | -4.58934900 | -1.12260300 |
| C  | 3.34496100  | -3.51117900 | -0.31772600 |
| H  | 2.61916400  | -4.09949100 | -0.87022800 |
| C  | -5.04376300 | -4.08617200 | -0.53768900 |
| H  | -5.73994800 | -4.91375200 | -0.62842700 |
| C  | -3.84879700 | 4.33398400  | 0.13371200  |
| H  | -4.29953700 | 5.32093700  | 0.16972300  |

Sum of electronic and zero-point Energies= -1916.540206  
Sum of electronic and thermal Energies= -1916.496174  
Sum of electronic and thermal Enthalpies= -1916.495056  
Sum of electronic and thermal Free Energies= -1916.627128

### Meisenheimer Complex

|   |             |             |             |
|---|-------------|-------------|-------------|
| O | 0.90553300  | -0.07636100 | 1.82159400  |
| N | -0.48126100 | 1.50284500  | 0.93508400  |
| C | 0.04890500  | 0.96574300  | 1.95326100  |
| C | -0.12651100 | 1.30252000  | 3.40653600  |
| H | -0.95117100 | 1.99942000  | 3.55051100  |
| H | -0.31297400 | 0.38327900  | 3.96593100  |
| H | 0.79273500  | 1.75066900  | 3.79429500  |
| C | -1.31197000 | 2.62942900  | 1.02531600  |
| C | -2.59670400 | 2.56166500  | 0.46890700  |
| C | -0.86475100 | 3.84591600  | 1.56038700  |
| C | -3.43096500 | 3.67696200  | 0.48520400  |
| H | -2.92885100 | 1.62517800  | 0.02967000  |
| C | -1.70077200 | 4.96133200  | 1.56378800  |
| H | 0.14270200  | 3.91189300  | 1.96229000  |
| C | -2.98829600 | 4.88281800  | 1.03218900  |
| H | -4.42801100 | 3.60474700  | 0.06099700  |
| H | -1.34068900 | 5.89670600  | 1.98183300  |
| H | -3.63594900 | 5.75346600  | 1.03649600  |
| C | 1.23968000  | -0.60283200 | 0.54188000  |
| C | 2.55253800  | -0.33984200 | -0.02839300 |

|   |             |             |             |
|---|-------------|-------------|-------------|
| C | 1.51369800  | 0.18862400  | -0.65504900 |
| C | 0.93454400  | 0.89192800  | -1.78570000 |
| C | -0.44306900 | 0.79588300  | -2.02987600 |
| C | 1.74355100  | 1.63507300  | -2.65499500 |
| C | -0.99890000 | 1.43568300  | -3.13312400 |
| H | -1.05314200 | 0.22271800  | -1.33809300 |
| C | 1.18070100  | 2.28176600  | -3.75284100 |
| H | 2.80913700  | 1.71555000  | -2.46367100 |
| H | -2.06564500 | 1.35834600  | -3.32027300 |
| H | 1.81076200  | 2.86377300  | -4.41787400 |
| C | 3.96495600  | -0.61749000 | 0.13973400  |
| C | 4.92175100  | -0.08100100 | -0.73395600 |
| C | 4.37675000  | -1.44207200 | 1.19629800  |
| C | 6.27079600  | -0.36760200 | -0.55104600 |
| H | 4.60551700  | 0.55649900  | -1.55317600 |
| C | 5.72748200  | -1.72692400 | 1.37494800  |
| H | 3.63076600  | -1.85416600 | 1.87021500  |
| H | 7.00733700  | 0.04934700  | -1.23029800 |
| H | 6.04097100  | -2.36556500 | 2.19443400  |
| O | 0.71822500  | -1.90670300 | 0.46556600  |
| N | -0.66199900 | -1.82972900 | 0.29131600  |
| C | -1.22256400 | -2.97976900 | 0.22700000  |
| C | -0.49537500 | -4.29212100 | 0.31511500  |
| H | -1.10254100 | -5.02768300 | 0.84621700  |
| H | -0.29735600 | -4.68019000 | -0.69006600 |
| H | 0.45878400  | -4.16928000 | 0.82493800  |
| C | -2.69682500 | -2.95801600 | 0.01803200  |
| C | -3.34442100 | -4.06258800 | -0.54625800 |
| C | -3.45526000 | -1.83148800 | 0.37011100  |
| C | -4.72105800 | -4.03662700 | -0.77094400 |
| H | -2.77587100 | -4.94411500 | -0.82607600 |
| C | -4.82823400 | -1.80871700 | 0.14817100  |
| H | -2.95789700 | -0.98171500 | 0.82692100  |
| C | -5.46634400 | -2.91105100 | -0.42573200 |
| H | -5.20837000 | -4.89763700 | -1.21746300 |
| H | -5.40407000 | -0.93252400 | 0.43016500  |
| H | -6.53807300 | -2.89299800 | -0.59681700 |
| C | -0.19009400 | 2.18163200  | -3.99426900 |
| H | -0.62845700 | 2.68460200  | -4.85070000 |
| C | 6.67577500  | -1.18992500 | 0.50262100  |
| H | 7.72902500  | -1.41107900 | 0.64363700  |

Sum of electronic and zero-point Energies= -1455.780800  
 Sum of electronic and thermal Energies= -1455.738947  
 Sum of electronic and thermal Enthalpies= -1455.737829  
 Sum of electronic and thermal Free Energies= -1455.867652

#### M\_TS6

|   |             |             |            |
|---|-------------|-------------|------------|
| O | -0.11753300 | -0.92556200 | 1.49559900 |
| N | 1.67837800  | 0.43826200  | 1.36264200 |
| C | 1.09895900  | -0.65536300 | 1.79960100 |
| C | 1.77856900  | -1.67169100 | 2.71015100 |
| H | 2.67515800  | -1.28031800 | 3.19339500 |
| H | 1.05683500  | -1.98678000 | 3.46701500 |
| H | 2.05692700  | -2.55900600 | 2.13084700 |
| C | 3.04448800  | 0.67237200  | 1.49674400 |
| C | 3.47303000  | 1.95333000  | 1.89712800 |

|   |             |             |             |
|---|-------------|-------------|-------------|
| C | 4.03848600  | -0.26544700 | 1.14974300  |
| C | 4.82573200  | 2.27096000  | 1.98224100  |
| H | 2.71628700  | 2.69413600  | 2.14218500  |
| C | 5.39145700  | 0.05787000  | 1.23076200  |
| H | 3.74072700  | -1.24988500 | 0.79616500  |
| C | 5.79891100  | 1.32496900  | 1.65141500  |
| H | 5.12252600  | 3.26554900  | 2.30380000  |
| H | 6.13274900  | -0.68730000 | 0.95288700  |
| H | 6.85375800  | 1.57394000  | 1.71034000  |
| C | -0.50899900 | -0.82255100 | -0.64517000 |
| C | 0.76127900  | -0.76801300 | -1.18240200 |
| C | 0.02813500  | 0.37753700  | -1.07592300 |
| C | -0.11110400 | 1.80598600  | -1.21843400 |
| C | -1.36752300 | 2.39490000  | -1.02116400 |
| C | 1.00530500  | 2.59542700  | -1.52583800 |
| C | -1.50453500 | 3.77390900  | -1.14497900 |
| H | -2.21469300 | 1.76208700  | -0.77316100 |
| C | 0.86085700  | 3.97245900  | -1.64312500 |
| H | 1.97828900  | 2.13069900  | -1.64896900 |
| H | -2.47453900 | 4.23662700  | -0.99662300 |
| H | 1.72219200  | 4.58907400  | -1.87692800 |
| C | 1.99175200  | -1.46948800 | -1.44947400 |
| C | 3.06093400  | -0.83292800 | -2.09288200 |
| C | 2.12238100  | -2.78673200 | -0.98645200 |
| C | 4.25985100  | -1.51392000 | -2.26738600 |
| H | 2.95064700  | 0.18596200  | -2.44907400 |
| C | 3.33041500  | -3.45613300 | -1.15090300 |
| H | 1.28452300  | -3.26509700 | -0.48674000 |
| H | 5.09169300  | -1.02512200 | -2.76319600 |
| H | 3.44216700  | -4.47011000 | -0.78196300 |
| O | -1.57466200 | -1.56605600 | -0.51947800 |
| N | -2.71344600 | -0.75213000 | -0.25868400 |
| C | -3.72757300 | -1.48131900 | 0.02829400  |
| C | -3.71323100 | -2.98232600 | 0.07057000  |
| H | -4.54112000 | -3.35471400 | 0.67278600  |
| H | -3.80697000 | -3.38450000 | -0.94356000 |
| H | -2.77060500 | -3.33982900 | 0.48562000  |
| C | -4.97829700 | -0.72701200 | 0.30400600  |
| C | -6.21764000 | -1.29920300 | -0.00323200 |
| C | -4.93025200 | 0.55915700  | 0.85763700  |
| C | -7.39360500 | -0.58635100 | 0.22295400  |
| H | -6.26921400 | -2.29467900 | -0.43396700 |
| C | -6.10723800 | 1.26407800  | 1.09044300  |
| H | -3.96952000 | 0.99218800  | 1.11779200  |
| C | -7.34099700 | 0.69451400  | 0.77072200  |
| H | -8.34999400 | -1.03432300 | -0.02681400 |
| H | -6.06161300 | 2.25589500  | 1.52883100  |
| H | -8.25822400 | 1.24477400  | 0.95519700  |
| C | -0.39342900 | 4.55984600  | -1.45611800 |
| H | -0.50332900 | 5.63570300  | -1.54992300 |
| C | 4.39702900  | -2.81926500 | -1.78983800 |
| H | 5.33949600  | -3.34238100 | -1.91716700 |

Sum of electronic and zero-point Energies= -1455.744988  
 Sum of electronic and thermal Energies= -1455.703160  
 Sum of electronic and thermal Enthalpies= -1455.702042  
 Sum of electronic and thermal Free Energies= -1455.830134

**M2-Product+HCl**

|   |             |             |             |
|---|-------------|-------------|-------------|
| O | 0.00503200  | -1.43212000 | 1.64080200  |
| N | 1.45845300  | 0.28695900  | 1.45435300  |
| C | 1.13941600  | -0.92423700 | 1.88724000  |
| C | 2.07442200  | -1.77310100 | 2.75016500  |
| H | 2.88074700  | -1.19861800 | 3.20996600  |
| H | 1.47288300  | -2.25244000 | 3.52588800  |
| H | 2.52201200  | -2.56764700 | 2.14244300  |
| C | 2.74730200  | 0.79306700  | 1.48163000  |
| C | 2.92343400  | 2.16741300  | 1.75493600  |
| C | 3.90279200  | 0.05919600  | 1.13006700  |
| C | 4.17822700  | 2.76640600  | 1.71000700  |
| H | 2.04100200  | 2.75457300  | 1.99658100  |
| C | 5.15817700  | 0.66270700  | 1.08568900  |
| H | 3.80533600  | -0.99132500 | 0.86659400  |
| C | 5.31221400  | 2.01910600  | 1.37773500  |
| H | 4.27279000  | 3.82639300  | 1.93136200  |
| H | 6.02317100  | 0.06572400  | 0.80704400  |
| H | 6.29111000  | 2.48624500  | 1.33611100  |
| C | -0.57653700 | -1.00290000 | -0.91850000 |
| C | 0.76252600  | -0.99491800 | -1.19377100 |
| C | 0.05967100  | 0.18862800  | -1.15737400 |
| C | 0.03311600  | 1.62526500  | -1.25418900 |
| C | -1.20027100 | 2.28743600  | -1.32168100 |
| C | 1.23634200  | 2.34403100  | -1.25699200 |
| C | -1.22471300 | 3.67519000  | -1.40914600 |
| H | -2.11764200 | 1.70652300  | -1.30373100 |
| C | 1.20082600  | 3.73102500  | -1.33484600 |
| H | 2.18140600  | 1.81751100  | -1.15852200 |
| H | -2.17363800 | 4.19768100  | -1.46753300 |
| H | 2.12638500  | 4.29705500  | -1.32468800 |
| C | 2.02250600  | -1.68157200 | -1.31856100 |
| C | 3.10181300  | -1.05167000 | -1.95221500 |
| C | 2.16441500  | -2.95910600 | -0.75914900 |
| C | 4.32620900  | -1.70435200 | -2.02704800 |
| H | 2.97558600  | -0.06404400 | -2.38459400 |
| C | 3.40069900  | -3.59328900 | -0.81584200 |
| H | 1.31682900  | -3.42519100 | -0.26525200 |
| H | 5.16550900  | -1.22537100 | -2.51964600 |
| H | 3.52672600  | -4.57420000 | -0.37008100 |
| O | -1.65353800 | -1.67862000 | -0.69061500 |
| N | -2.75663100 | -0.78451600 | -0.48180700 |
| C | -3.76220100 | -1.43224100 | -0.02016900 |
| C | -3.77325900 | -2.91161000 | 0.23423200  |
| H | -4.61295800 | -3.18702600 | 0.86980600  |
| H | -3.85059900 | -3.45195300 | -0.71461100 |
| H | -2.84089600 | -3.21297200 | 0.71424500  |
| C | -4.96333300 | -0.59803600 | 0.24326900  |
| C | -6.24114400 | -1.15383600 | 0.11533600  |
| C | -4.82774000 | 0.74754200  | 0.61044500  |
| C | -7.37049800 | -0.36795400 | 0.33539200  |
| H | -6.35958700 | -2.19409100 | -0.17226200 |
| C | -5.95796100 | 1.52602400  | 0.83782200  |
| H | -3.83570200 | 1.17018600  | 0.73322900  |
| C | -7.23135500 | 0.97093400  | 0.69834600  |
| H | -8.35797800 | -0.80399800 | 0.22513400  |
| H | -5.84561100 | 2.56417500  | 1.13345100  |
| H | -8.11198900 | 1.57890400  | 0.88012500  |
| C | -0.02685700 | 4.39320300  | -1.41622200 |

|   |             |             |             |
|---|-------------|-------------|-------------|
| H | -0.04978800 | 5.47659500  | -1.47971400 |
| C | 4.47700300  | -2.96754500 | -1.45051900 |
| H | 5.43874000  | -3.46871000 | -1.49717800 |

Sum of electronic and zero-point Energies= -1455.746587  
Sum of electronic and thermal Energies= -1455.704277  
Sum of electronic and thermal Enthalpies= -1455.703160  
Sum of electronic and thermal Free Energies= -1455.831184

**M2+Product+Cl-**

|   |             |             |             |
|---|-------------|-------------|-------------|
| O | -1.30302800 | 0.57155900  | -0.78966700 |
| N | -3.32065900 | -0.32230600 | -0.52125600 |
| C | -2.12731200 | -0.47205700 | -0.95350200 |
| C | -1.53113400 | -1.67401300 | -1.63862300 |
| H | -2.30122300 | -2.37234700 | -1.96329100 |
| H | -0.93417100 | -1.34782000 | -2.49347600 |
| H | -0.85485800 | -2.18860300 | -0.94435000 |
| C | -4.27071300 | -1.35568700 | -0.58734900 |
| C | -5.52175500 | -1.07157800 | -1.15480400 |
| C | -4.05871700 | -2.62546400 | -0.02995900 |
| C | -6.51918500 | -2.04234400 | -1.19613200 |
| H | -5.69437600 | -0.08083200 | -1.56472500 |
| C | -5.06350300 | -3.59125100 | -0.06445300 |
| H | -3.10238300 | -2.84863000 | 0.43303300  |
| C | -6.29712300 | -3.30855900 | -0.65071000 |
| H | -7.47697600 | -1.80633700 | -1.65016500 |
| H | -4.87874500 | -4.56854700 | 0.37173600  |
| H | -7.07779400 | -4.06184600 | -0.67643600 |
| C | 3.50949600  | -0.29468400 | 0.41918700  |
| C | 2.21813700  | -0.55746600 | 0.83597900  |
| C | 1.16684100  | -1.45841300 | 1.23006700  |
| C | -0.05349900 | -0.91597900 | 1.66374100  |
| C | 1.35544800  | -2.84740000 | 1.17240100  |
| C | -1.07754000 | -1.77125400 | 2.05396700  |
| H | -0.18177200 | 0.16218500  | 1.67636300  |
| C | 0.32212000  | -3.69306600 | 1.55667300  |
| H | 2.29599100  | -3.25649400 | 0.82015000  |
| C | -0.88762300 | -3.15444900 | 2.00321300  |
| H | -2.02494100 | -1.36139400 | 2.38934400  |
| H | 0.45698300  | -4.76804000 | 1.51211600  |
| C | 4.83439800  | -0.71155800 | 0.04481300  |
| C | 5.24544700  | -2.04072700 | 0.21998900  |
| C | 5.70840200  | 0.24231900  | -0.49937600 |
| C | 6.53092700  | -2.41257000 | -0.15331900 |
| H | 4.56709400  | -2.76774800 | 0.65274200  |
| C | 6.99016700  | -0.14049800 | -0.87493200 |
| H | 5.37400300  | 1.26751500  | -0.62630800 |
| C | 7.39878300  | -1.46479000 | -0.70132100 |
| H | 6.85779500  | -3.43772800 | -0.01896900 |
| H | 7.67043900  | 0.58874700  | -1.30067900 |
| O | 2.35241200  | 1.98397100  | 0.46034000  |
| N | 0.97471900  | 2.23839000  | 0.82518000  |
| C | 0.52688100  | 3.22670300  | 0.14119200  |
| C | 1.30927700  | 3.93541300  | -0.92436200 |
| H | 1.45862100  | 3.24671800  | -1.76315500 |
| H | 0.79149900  | 4.83102700  | -1.26125600 |
| H | 2.29334900  | 4.21338900  | -0.54221700 |

|    |             |             |             |
|----|-------------|-------------|-------------|
| C  | -0.87077700 | 3.60832500  | 0.46391800  |
| C  | -1.69575500 | 4.13536900  | -0.53578500 |
| C  | -1.38307500 | 3.41534800  | 1.75369700  |
| C  | -3.02273400 | 4.45069700  | -0.25245900 |
| H  | -1.31509100 | 4.27605300  | -1.54247900 |
| C  | -2.70643800 | 3.74093300  | 2.03488000  |
| H  | -0.73719300 | 3.02235100  | 2.53206800  |
| C  | -3.52949500 | 4.25649500  | 1.03214500  |
| H  | -3.65959800 | 4.84761500  | -1.03614100 |
| H  | -3.09439100 | 3.59757300  | 3.03812200  |
| H  | -4.56141700 | 4.50992400  | 1.25315400  |
| Cl | 1.36744900  | 0.39927200  | -2.27157500 |
| H  | -0.42640100 | 0.43418800  | -1.22795500 |
| C  | 2.60387200  | 0.72642300  | 0.54783700  |
| H  | -1.68851300 | -3.82012000 | 2.31104400  |
| H  | 8.40103800  | -1.76055800 | -0.99400800 |

Sum of electronic and zero-point Energies= -1916.557048  
Sum of electronic and thermal Energies= -1916.511113  
Sum of electronic and thermal Enthalpies= -1916.509995  
Sum of electronic and thermal Free Energies= -1916.650698

#### M\_TS7

|   |             |             |             |
|---|-------------|-------------|-------------|
| O | -1.49471000 | 0.64340400  | -1.02979600 |
| N | -3.46787100 | -0.34126700 | -0.74649300 |
| C | -2.25591900 | -0.46255900 | -1.12380900 |
| C | -1.57104300 | -1.68115200 | -1.68399500 |
| H | -2.29257500 | -2.44777900 | -1.96266900 |
| H | -0.97536700 | -1.39895500 | -2.55549000 |
| H | -0.88556700 | -2.09413900 | -0.93427000 |
| C | -4.35115300 | -1.43596700 | -0.74526400 |
| C | -5.58222900 | -1.30261300 | -1.40264400 |
| C | -4.08723500 | -2.61747700 | -0.03739200 |
| C | -6.51062000 | -2.34053900 | -1.38204600 |
| H | -5.79458300 | -0.37797000 | -1.93096100 |
| C | -5.02432300 | -3.64913500 | -0.01064600 |
| H | -3.14593100 | -2.71834500 | 0.49507500  |
| C | -6.23833900 | -3.51965700 | -0.68540200 |
| H | -7.45426400 | -2.22471700 | -1.90664500 |
| H | -4.80226800 | -4.55696400 | 0.54246000  |
| H | -6.96627000 | -4.32412500 | -0.66345600 |
| C | 3.23425700  | -0.64261400 | 0.17558400  |
| C | 1.97670500  | -0.74781500 | 0.66330300  |
| C | 0.90727900  | -1.45709200 | 1.32316200  |
| C | -0.28770200 | -0.77241000 | 1.59468600  |
| C | 1.04062500  | -2.81321400 | 1.65542100  |
| C | -1.34249200 | -1.44766200 | 2.19969300  |
| H | -0.37228600 | 0.27455200  | 1.31788300  |
| C | -0.02066300 | -3.48050500 | 2.25700200  |
| H | 1.96274900  | -3.33920700 | 1.43122000  |
| C | -1.20905300 | -2.79833500 | 2.52997700  |
| H | -2.27108000 | -0.92434300 | 2.40557200  |
| H | 0.07510000  | -4.53063100 | 2.51106400  |
| C | 4.56821800  | -1.13355500 | -0.06794000 |
| C | 4.98636100  | -2.37684600 | 0.42741800  |
| C | 5.44572000  | -0.33884800 | -0.82002500 |
| C | 6.27895900  | -2.81869200 | 0.17012300  |
| H | 4.30419200  | -2.98477800 | 1.01219400  |



|    |             |             |             |
|----|-------------|-------------|-------------|
| C  | 6.73556500  | -0.79029700 | -1.07738700 |
| H  | 5.10660100  | 0.62147000  | -1.19762100 |
| C  | 7.15116800  | -2.02777300 | -0.58204700 |
| H  | 6.60789700  | -3.77872200 | 0.55309100  |
| H  | 7.41620600  | -0.18014700 | -1.66125500 |
| O  | 2.34443800  | 1.72655800  | 0.09945100  |
| N  | 1.04494900  | 2.17904000  | 0.46187000  |
| C  | 0.88161500  | 3.39740100  | 0.09686000  |
| C  | 1.90720900  | 4.18502100  | -0.66794100 |
| H  | 2.04071900  | 3.74811600  | -1.66219400 |
| H  | 1.61151800  | 5.22793400  | -0.76358800 |
| H  | 2.87029900  | 4.13389100  | -0.15588000 |
| C  | -0.42853000 | 3.98898600  | 0.47024200  |
| C  | -1.03166700 | 4.93640200  | -0.36498500 |
| C  | -1.08514200 | 3.58425500  | 1.64036800  |
| C  | -2.28209100 | 5.46003000  | -0.04229900 |
| H  | -0.53886600 | 5.25230800  | -1.27922000 |
| C  | -2.32953300 | 4.11646800  | 1.96415000  |
| H  | -0.60847500 | 2.86255700  | 2.29588200  |
| C  | -2.93197800 | 5.05322100  | 1.12238700  |
| H  | -2.74705300 | 6.18563400  | -0.70160800 |
| H  | -2.82736800 | 3.80453000  | 2.87658700  |
| H  | -3.90219900 | 5.46787500  | 1.37654900  |
| Cl | 1.46669100  | 0.28392800  | -2.12825600 |
| H  | -0.58455400 | 0.48984600  | -1.35645400 |
| C  | 2.33596300  | 0.41014900  | -0.04433300 |
| H  | -2.03590600 | -3.32380800 | 2.99813000  |
| H  | 8.15863100  | -2.37803800 | -0.78223700 |

Sum of electronic and zero-point Energies= -1916.545687  
Sum of electronic and thermal Energies= -1916.500628  
Sum of electronic and thermal Enthalpies= -1916.499510  
Sum of electronic and thermal Free Energies= -1916.638088

### M1+Product

|   |             |             |             |
|---|-------------|-------------|-------------|
| O | -1.54673100 | 0.86862900  | -1.68581700 |
| N | -3.40771700 | -0.11708000 | -0.97046600 |
| C | -2.28173700 | -0.25773400 | -1.54569400 |
| C | -1.67274700 | -1.50658900 | -2.12470500 |
| H | -2.41542800 | -2.29744600 | -2.21862600 |
| H | -1.24809800 | -1.28574700 | -3.10722400 |
| H | -0.85924300 | -1.86092400 | -1.48136700 |
| C | -4.22346300 | -1.22572000 | -0.68193600 |
| C | -5.58143600 | -1.16682900 | -1.02354000 |
| C | -3.74753400 | -2.34371900 | 0.01927500  |
| C | -6.43609500 | -2.21849200 | -0.70225600 |
| H | -5.95155300 | -0.28946900 | -1.54547300 |
| C | -4.61002000 | -3.38755000 | 0.34933200  |
| H | -2.70326300 | -2.38141800 | 0.31837800  |
| C | -5.95622900 | -3.33403900 | -0.01290800 |
| H | -7.48314600 | -2.16253100 | -0.98419200 |
| H | -4.22554000 | -4.24381700 | 0.89586800  |
| H | -6.62576600 | -4.14803800 | 0.24540300  |
| C | 2.61744400  | -1.23907700 | 0.02602000  |
| C | 1.37784700  | -0.94610900 | 0.39866500  |
| C | 0.19935600  | -1.16650200 | 1.21425000  |
| C | -0.76559700 | -0.15407700 | 1.32694400  |

|    |             |             |             |
|----|-------------|-------------|-------------|
| C  | 0.04503800  | -2.36220000 | 1.93393800  |
| C  | -1.85908000 | -0.33056900 | 2.17119800  |
| H  | -0.63638600 | 0.76338700  | 0.75945200  |
| C  | -1.05209700 | -2.53179400 | 2.77180500  |
| H  | 0.78472000  | -3.15021600 | 1.83523400  |
| C  | -1.99987500 | -1.51254100 | 2.89845600  |
| H  | -2.60559400 | 0.45294700  | 2.25348300  |
| H  | -1.16857600 | -3.45643500 | 3.32762800  |
| C  | 3.83422600  | -2.02057000 | 0.03932100  |
| C  | 3.94732500  | -3.18146600 | 0.81771900  |
| C  | 4.91594100  | -1.59624900 | -0.74562400 |
| C  | 5.13361400  | -3.90725300 | 0.80902000  |
| H  | 3.11006400  | -3.50824300 | 1.42554100  |
| C  | 6.09963800  | -2.32780000 | -0.75152500 |
| H  | 4.81823900  | -0.69501800 | -1.34442500 |
| C  | 6.20923200  | -3.48223700 | 0.02540200  |
| H  | 5.22115600  | -4.80482000 | 1.41221500  |
| H  | 6.93573600  | -1.99857800 | -1.35948100 |
| O  | 2.46149300  | 1.21843000  | -0.28698900 |
| N  | 1.35084000  | 2.05900800  | -0.13200700 |
| C  | 1.67947100  | 3.28236500  | 0.06179600  |
| C  | 3.09205400  | 3.79052200  | 0.11752600  |
| H  | 3.16697100  | 4.74935500  | -0.39896300 |
| H  | 3.39087200  | 3.94512600  | 1.15963900  |
| H  | 3.77979600  | 3.07944400  | -0.33520200 |
| C  | 0.54193100  | 4.22167700  | 0.26860500  |
| C  | 0.76678500  | 5.48217700  | 0.83331400  |
| C  | -0.76643200 | 3.85540400  | -0.08519700 |
| C  | -0.29588900 | 6.35984000  | 1.05040700  |
| H  | 1.76943000  | 5.78475800  | 1.11764600  |
| C  | -1.82238500 | 4.73458000  | 0.13014900  |
| H  | -0.94923800 | 2.88449300  | -0.53561200 |
| C  | -1.59208800 | 5.98960000  | 0.69970500  |
| H  | -0.10652400 | 7.33208700  | 1.49392200  |
| H  | -2.82894400 | 4.44210600  | -0.15258600 |
| H  | -2.41839500 | 6.67380900  | 0.86457500  |
| Cl | 1.51935800  | -0.10612200 | -2.35668700 |
| H  | -0.66526500 | 0.66768300  | -2.04352600 |
| C  | 2.01737300  | -0.06343100 | -0.55824000 |
| H  | -2.85528000 | -1.64800000 | 3.55285400  |
| H  | 7.13280100  | -4.05209900 | 0.02098500  |

Sum of electronic and zero-point Energies= -1916.550688  
Sum of electronic and thermal Energies= -1916.505588  
Sum of electronic and thermal Enthalpies= -1916.504470  
Sum of electronic and thermal Free Energies= -1916.641840

## FIGURES

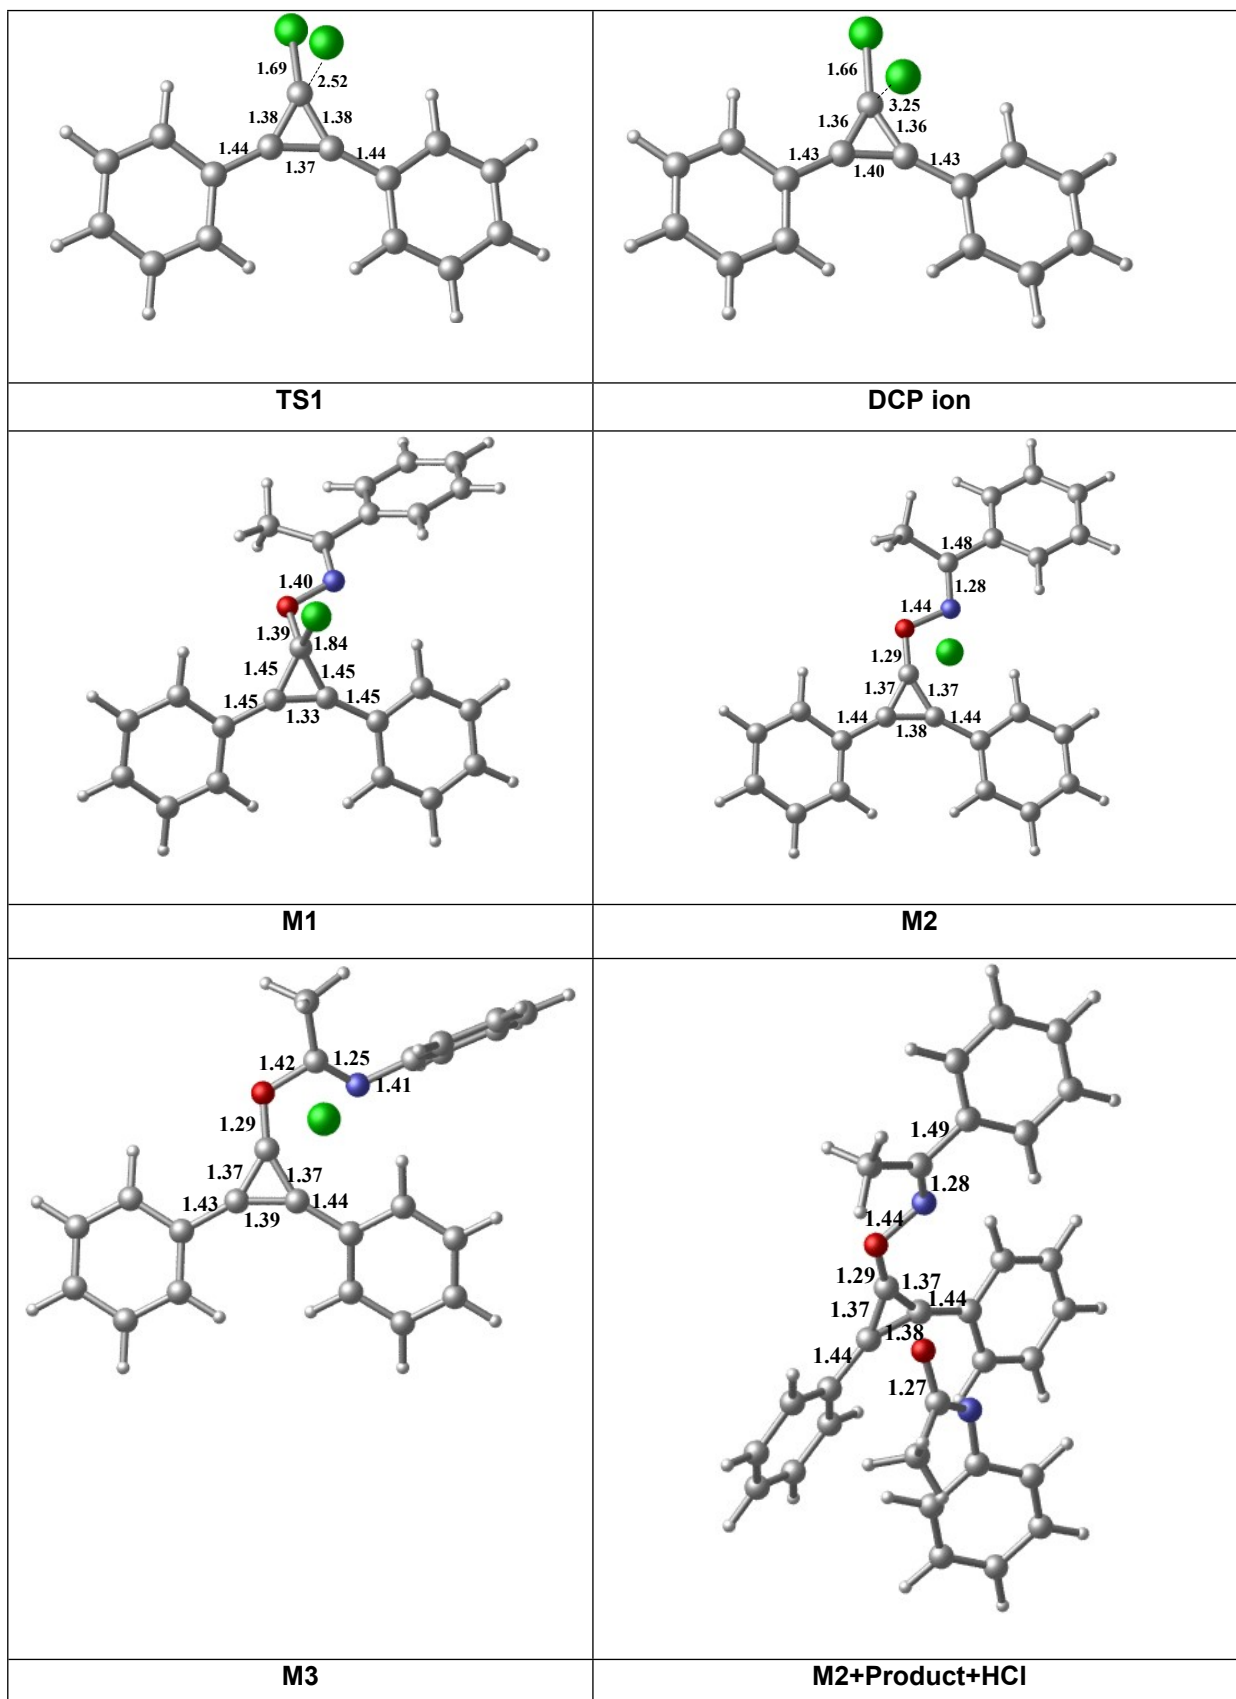

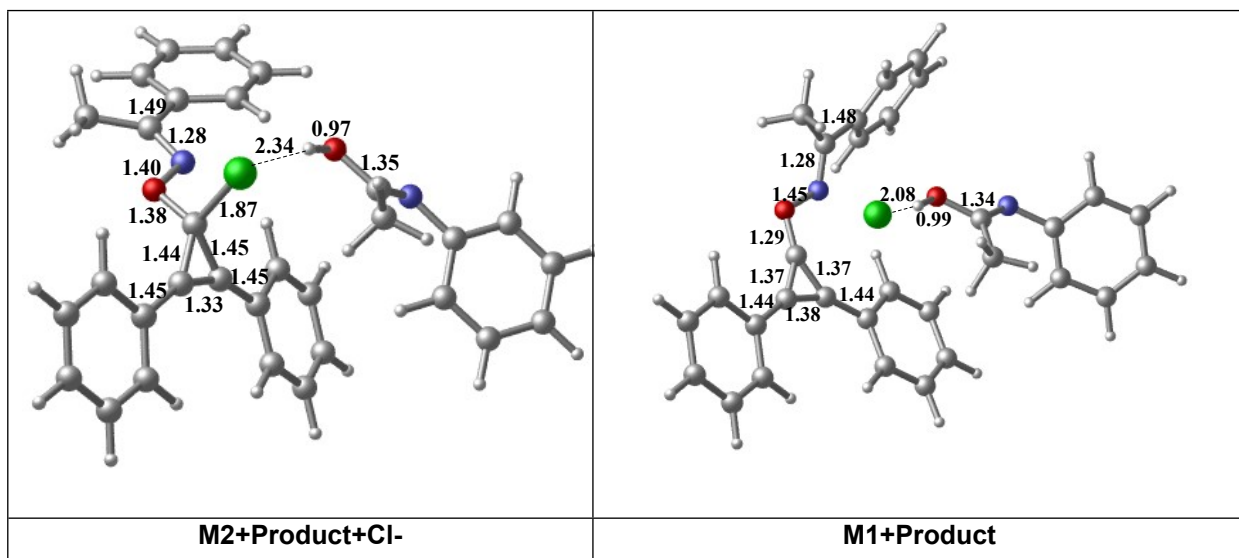

Figure S1.1. Key geometrical parameters and 3D Structures of Intermediates along the reaction coordinate

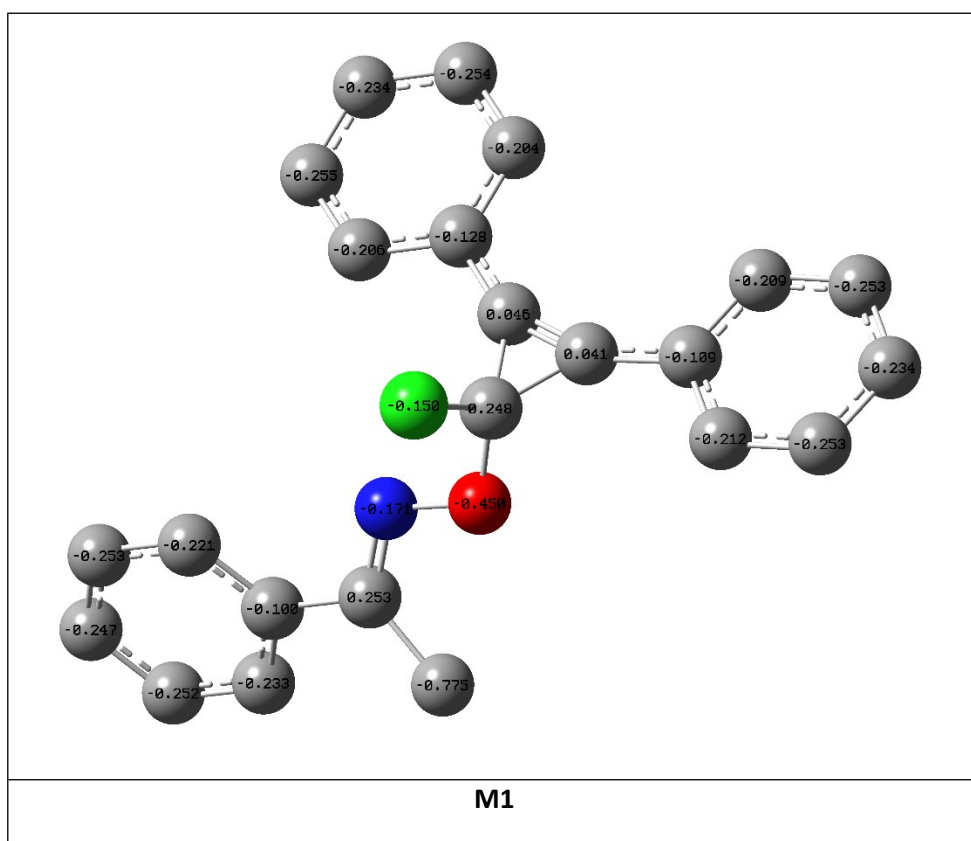

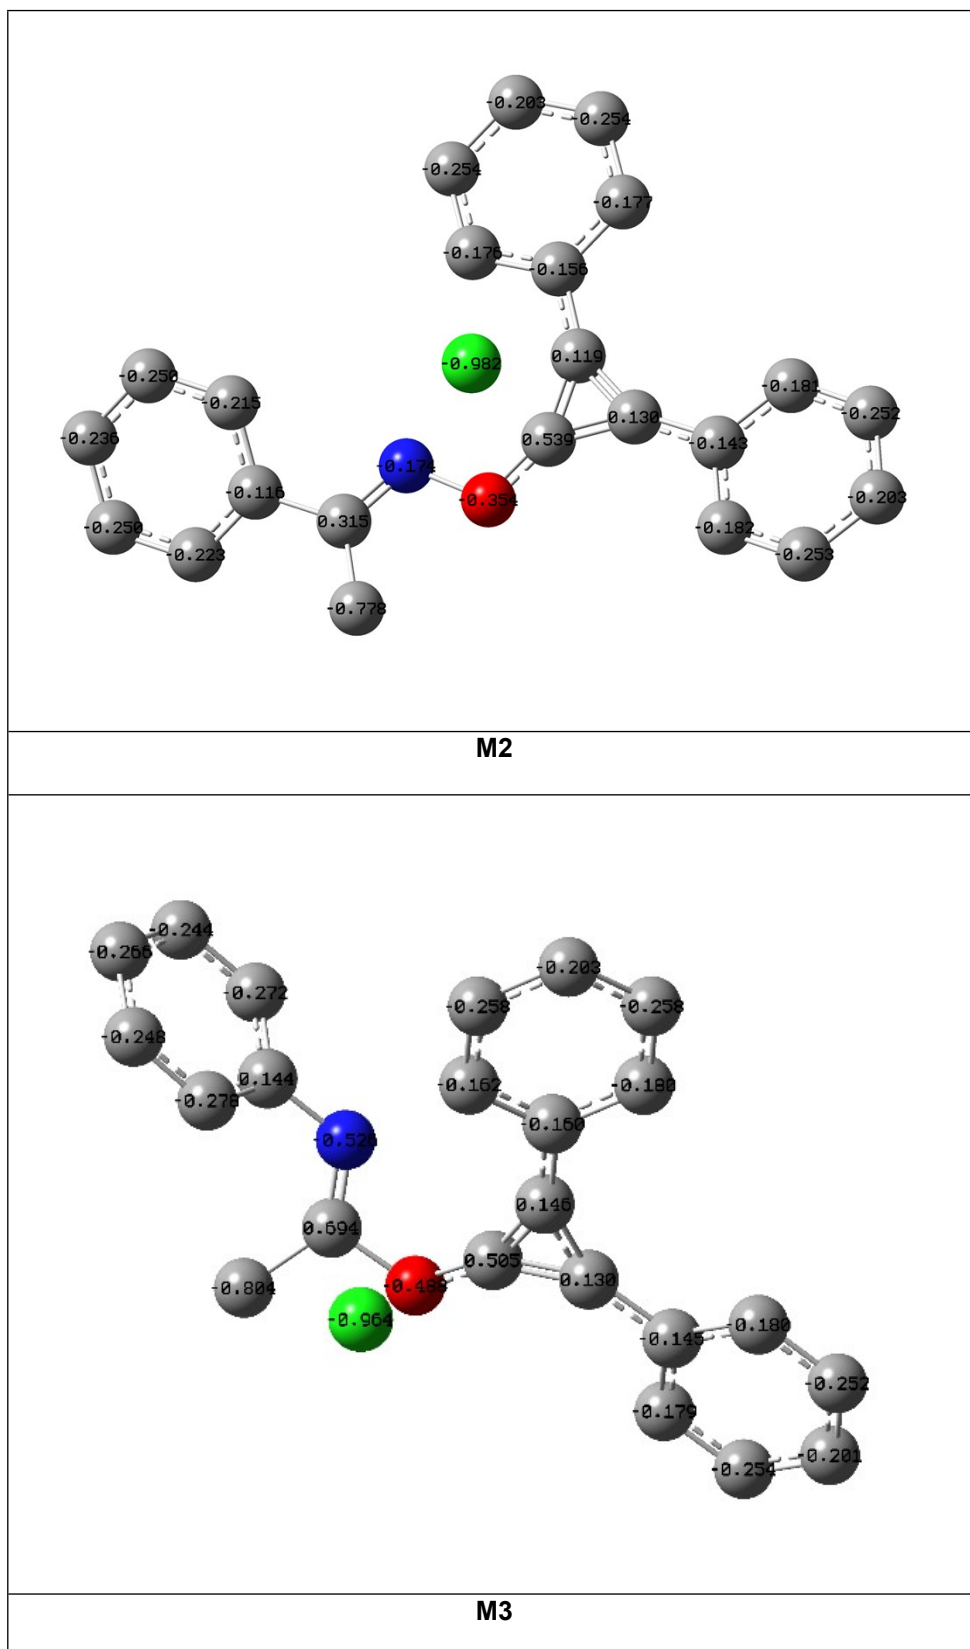

Figure SI.2. NBO charges on heavy atoms of M1, M2 and M3 Structures.

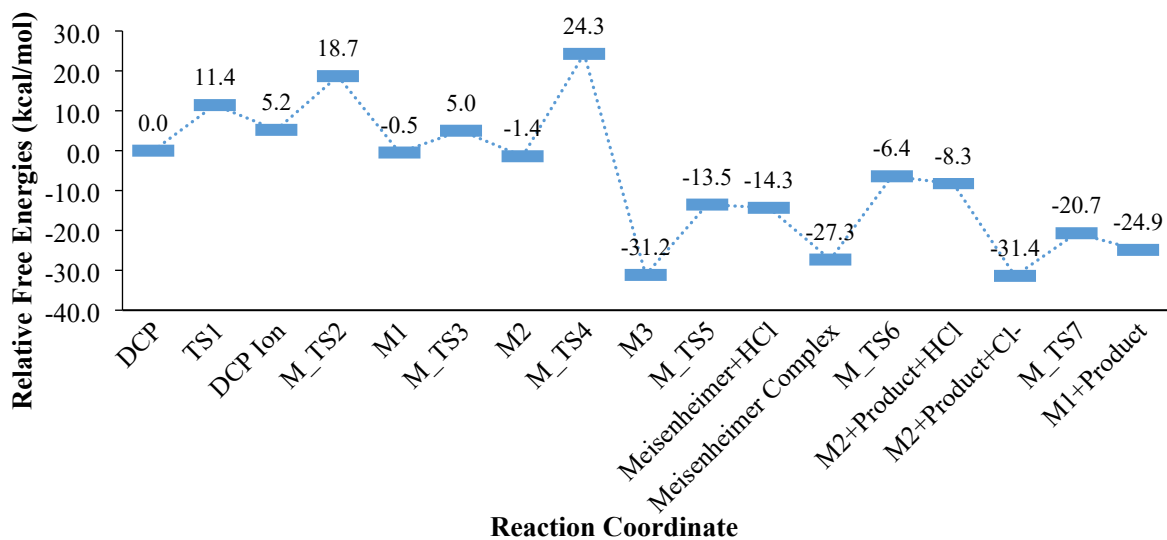

Figure SI.3. Reaction Energy Profile of Beckmann Rearrangement with 1,1-dichloro-2,3-p-Metoxycyclopropane at 80°C.

## TABLES

Table SI.1. : Second Order Perturbation Analysis of Fock Matrix Energies in NBO Basis (kcal/mol) for DCP Ion.

| Donor (i)         | Acceptor (j)       | E(2) kcal/mol |
|-------------------|--------------------|---------------|
| BD (1) C 1 - C 2  | BD*( 1) C 1 - C 3  | 13.59         |
| BD (1) C 1 - C 2  | BD*( 1) C 2 - C 3  | 7.45          |
| BD (1) C 1 - C 2  | BD*( 1) C 2 - C 6  | 7.52          |
| BD (1) C 1 - C 2  | BD*( 1) C 3 - C 7  | 31.31         |
| BD (1) C 1 - C 3  | BD*( 1) C 1 - C 2  | 12.11         |
| BD (1) C 1 - C 3  | BD*( 1) C 2 - C 3  | 5.45          |
| BD (1) C 1 - C 3  | BD*( 1) C 2 - C 6  | 34.50         |
| BD (1) C 1 - C 3  | BD*( 1) C 3 - C 7  | 6.95          |
| BD (1) C 2 - C 3  | BD*( 1) C 1 - C 2  | 8.10          |
| BD (1) C 2 - C 3  | BD*( 1) C 1 - C 3  | 7.41          |
| BD (1) C 2 - C 3  | BD*( 1) C 7 - C 7' | 2.31          |
| BD (1) C 2 - C 3  | BD*( 1) C 6 - C 6' | 2.36          |
| BD (1) C 2 - C 3  | BD*( 1) C 3 - C 7  | 5.19          |
| BD ( 1) C 2 - C 3 | BD*( 1) C 2 - C 6  | 6.00          |

Table SI.2 NBO Charge (eV) variations among reaction coordinate structures M\_TS5, Meisenheimer-HCl Complex Intermediate, Meisenheimer Complex

|     | M_TS5  | Meisenheimer-HCl<br>Complex Intermediate | Meisenheimer<br>Complex |
|-----|--------|------------------------------------------|-------------------------|
| N9  | -0.522 | -0.539                                   | -0.556                  |
| O8  | -0.542 | -0.573                                   | -0.580                  |
| C10 | 0.647  | 0.650                                    | 0.654                   |
| C1  | 0.505  | 0.516                                    | 0.520                   |
| O12 | -0.580 | -0.517                                   | -0.455                  |
| H13 | 0.521  | 0.468                                    | -                       |
| N14 | -0.166 | -0.167                                   | -0.163                  |
| C15 | 0.276  | 0.307                                    | 0.241                   |
| Cl  | -0.811 | -0.675                                   | -                       |

Table SI.3. The NBO Second Order Perturbation Energy Interactions for structure M\_TS5

| <b>Donor (i)</b> | <b>Acceptor (j)</b> | <b>E(2) kcal/mol</b> |
|------------------|---------------------|----------------------|
| LP (1) O8        | LP* (1) C1          | 2.0                  |
| LP (2) O8        | LP* (1) C1          | 71.60                |
| LP (1) Cl        | LP* (1) H13         | 5.98                 |
| LP (2) Cl        | LP* (1) H13         | 0.16                 |
| LP (3) Cl        | LP* (1) H13         | 0.13                 |
| LP (4) Cl        | LP* (1) H13         | 117.81               |
| LP (1) O12       | LP* (1) C1          | 12.27                |
| LP (2) O12       | LP* (1) C1          | 30.86                |
| LP (3) O12       | LP* (1) C1          | 177.44               |
| LP (1) O12       | LP* (1) H13         | 7.02                 |
| LP (2) O12       | LP* (1) H13         | 295.0                |
| LP (3) O12       | LP* (1) H13         | 4.74                 |
